# Supplementary material for: Anticorrosive and electromagnetic shielding response of a graphene/TiO2–epoxy nanocomposite with enhanced mechanical properties
Source: Royal Society of Chemistry journal article supplement (doi:10.1039/c6ra15273b), 2016-01-01
Supplement: c6ra15273b1.pdf [file c6ra15273b1.pdf]

## Supporting Results

### 1. TGA Analysis:

To substantiate potential of these nanocomposites in high temperature applications it becomes necessary to study thermal properties, so thermal stability of these nanocomposites was studied by recording thermogravimetric analysis (TGA) scans. Thermo-gravimetric analysis (TGA) was carried out on thermal analyzer (TGA-Netzsch) using alumina as the reference material from room temperature to 600 °C with heating rate of 10 °C/min under nitrogen purging with flow rate of 50 mL/min. TGA curves of neat epoxy and different types of nano-filler ( $\text{TiO}_2$ , GP and  $\text{TiO}_2$ +GP) are shown in Fig. 1. The thermal degradation of all materials has been taken between 150-600 °C and the neat epoxy started to degrade at 300 °C. From the TGA curves it is clear that the thermal stability of nanofiller reinforced epoxy nanocomposites is greater than neat epoxy. The epoxy nanocomposite with  $\text{TiO}_2$  (0.25 wt.%)+GP (0.25 wt.%) shows maximum thermally stability as compared to others. Initial 5 % weight loss of materials is important for its load bearing applications. The 5% weight loss temperature for  $\text{TiO}_2$  (0.25 wt.%)+GP (0.25 wt.%) reinforced epoxy nanocomposite found to be maximum i.e 333 °C and for neat epoxy it was 323 °C. From the Fig. 1, it shows that the char yield percentage of  $\text{TiO}_2$  (0.25 wt.%)+GP (0.25 wt.%) reinforced epoxy nanocomposite shows maximum char residue i.e 28 % as compared to neat epoxy with char residue 22%.

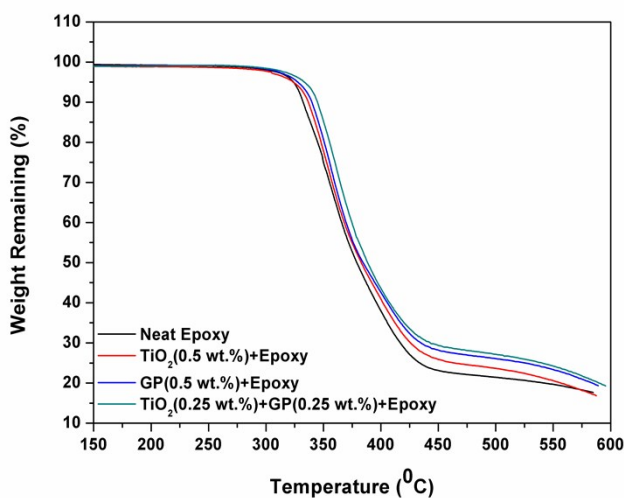

Fig. 1 TGA graph of  $\text{TiO}_2$ , Graphene (GP) and  $\text{TiO}_2$ +GP reinforced epoxy nanocomposite

## 2. FTIR Analysis:

FT-IR analysis of the neat epoxy and nanocomposites were carried out using their fine powder with KBr on Perkin Elmer spectrometer from 500 to 4000  $\text{cm}^{-1}$  wave number. Fig. 2 shows the FTIR spectra of neat epoxy and its nanocomposites. All FTIR spectra have many common signals and no significant change in peaks was observed with the reinforcement of graphene and  $\text{TiO}_2$  nanoparticles. The first one is the broad peak around 3500–4000  $\text{cm}^{-1}$ . It is corresponding to O–H stretching vibrations from C–OH groups and absorbed water molecules.<sup>[55]</sup> The signals from 2965 to 2873  $\text{cm}^{-1}$  arise due to C–H stretching of  $\text{CH}_2$  and CH aromatic and aliphatic. The absorptions at 1608, 1509, 1452, 1368, 1089, 1036 and 772  $\text{cm}^{-1}$  are attributed to the C=C of aromatic ring, C–C of aromatic, C–H of  $\text{CH}_2$  and  $\text{CH}_3$ ,  $\text{CH}_3$  of  $-\text{C}(\text{CH}_3)_2$ , C–O bonds, C–O–C of ethers and  $\text{CH}_2$  rocking respectively of epoxy chain and graphene.<sup>[1-2]</sup> The characteristic signal at  $\sim 520 \text{ cm}^{-1}$  from stretching vibration of the O–Ti–O lattice of  $\text{TiO}_2$  nanoparticles are overlapped by epoxy absorption band in range 500 to 600  $\text{cm}^{-1}$ .  
[3]

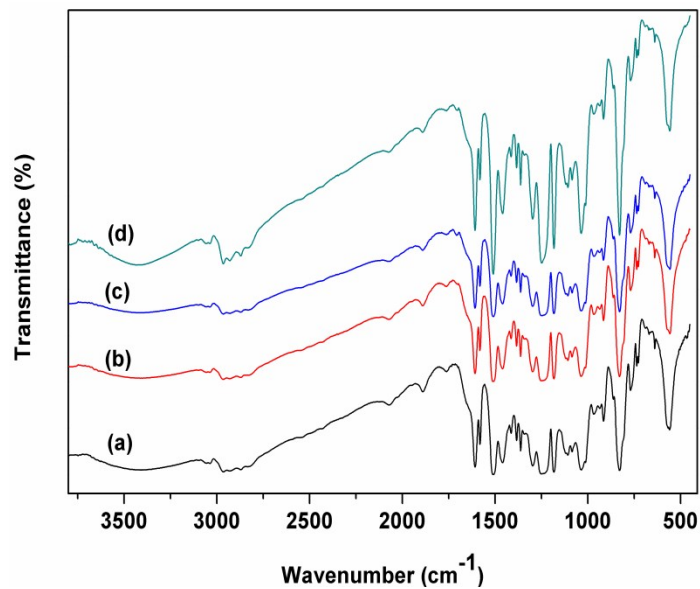

Fig. 2 FTIR spectra of (a) neat epoxy, (b)  $\text{TiO}_2$ -epoxy, (c) graphene-epoxy and (d) graphene/ $\text{TiO}_2$ -epoxy nanocomposite

**References:**

- [1] S. Verma, H. P. Mungse, N. Kumar, S. Choudhary, S. L. Jain, B. Sain and O. P. Khatri, *Chem. Commun.*, 2011, **47**, 12673–12675.
- [2] Z. Lu, G. Chen, W. Hao, G. Sun and Z. Li, *RSC Adv.*, 2015, **5**, 72916–72922.
- [3] C. Liu, D. Yang, Y. Jiao, Y. Tian, Y. Wang and Z. Jiang. *ACS Appl. Mater. Interfaces*, 2013, **5**, 3824–3832.
